# Supplementary material
Source: publisher site journal article supplement (https://www.dovepress.com/article/378649)
Supplement: Supplementary file 1 [file get_supplementary_file.php]

**Supplementary Figure 1.** Inclusion and exclusion criteria and study flow chart

**
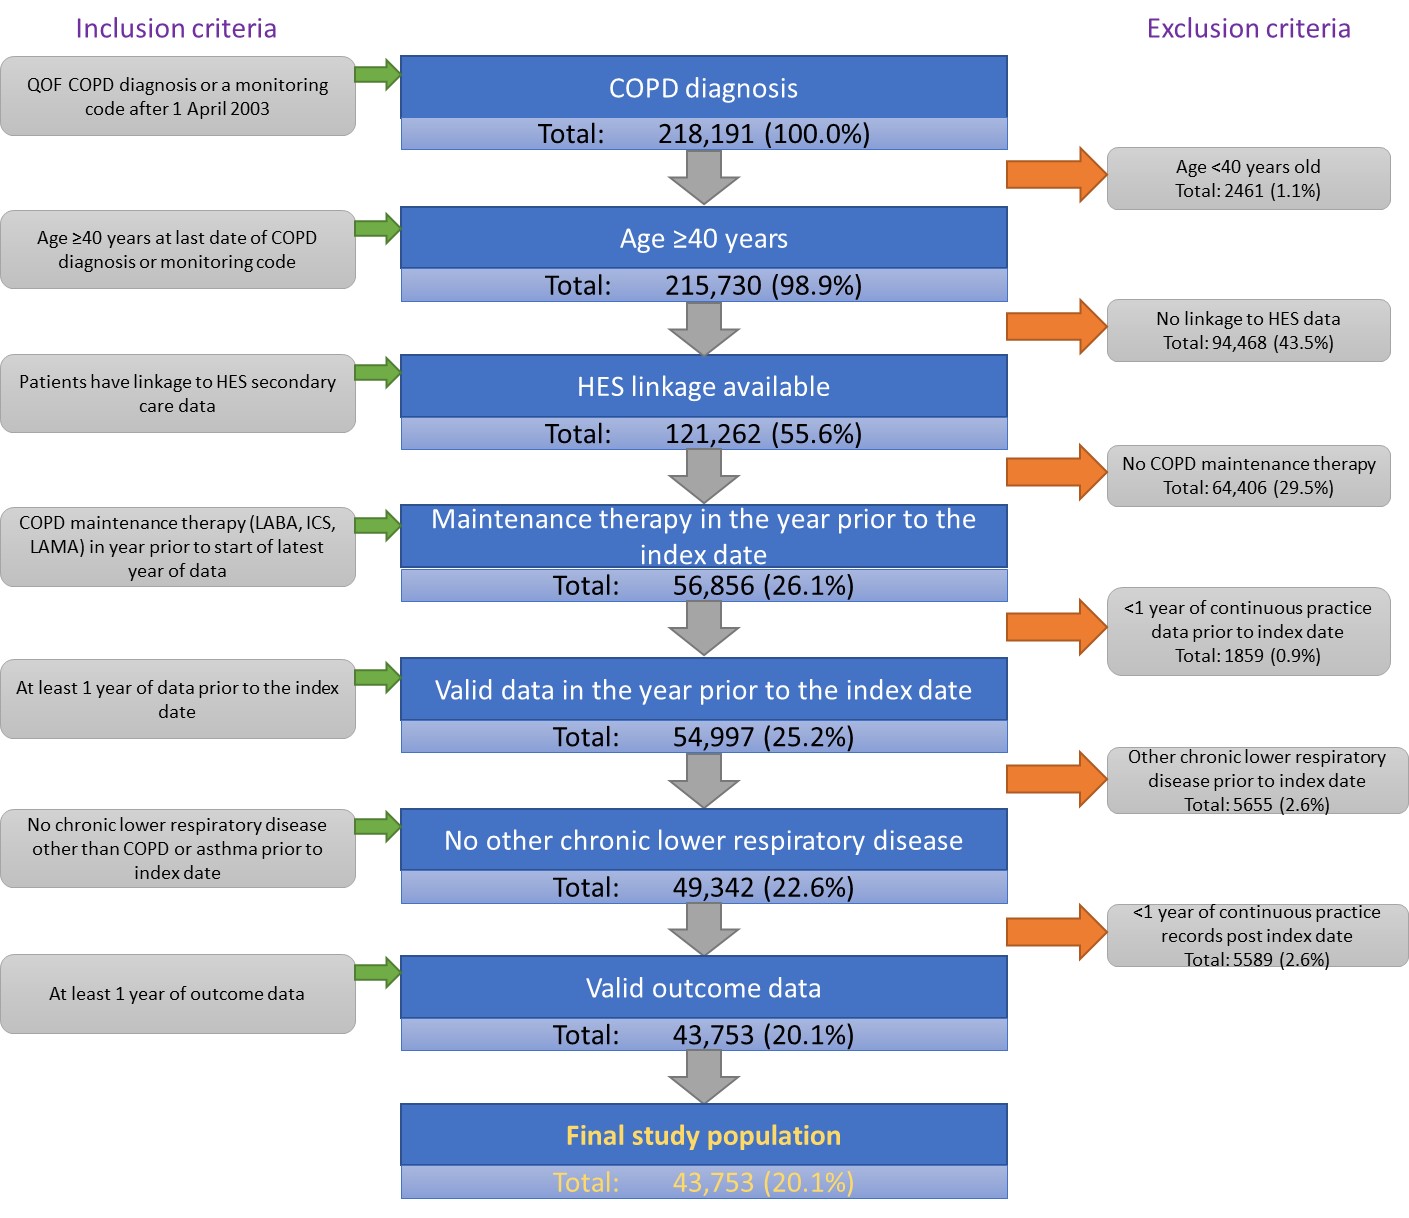
**

Abbreviations: COPD, chronic obstructive pulmonary disease; HES, hospital episode statistics; ICS, inhaled corticosteroid; ID, index date; LABA, long-acting β2-agonist; LAMA, long-acting muscarinic antagonist; QOF, Quality and Outcomes Framework.

**Supplementary Table 1.** Percentage of Patients Experiencing Exacerbations During the Outcome Year According to Characteristics in the Year Prior to the Index Date

|  | **Maintenance-Treated COPD Cohort**  **(N=43,753), %** | | | | **Frequently Exacerbating Cohort**  **(N=6480), %** | | | |
| --- | --- | --- | --- | --- | --- | --- | --- | --- |
| Exacerbations in the outcome year: | 0 | 1 | 2 | ≥3 | 0 | 1 | 2 | ≥3 |
| Exacerbations in the year prior to the index date | | | | | | | | |
| 0 | 65.7 | 21.2 | 7.7 | 5.4 |  |  |  |  |
| 1 | 43.7 | 28.3 | 14.4 | 13.5 | 37.5 | 31.4 | 15.0 | 16.1 |
| 2 | 27.6 | 27.8 | 19.5 | 25.1 | 22.7 | 26.6 | 20.0 | 30.7 |
| ≥3 | 15.0 | 18.3 | 19.2 | 47.6 | 13.0 | 17.2 | 18.7 | 51.1 |
| Average daily OCS dose in the year prior to the index date (mg/day) | | | | | | | | |
| None | 62.6 | 22.9 | 8.6 | 5.9 | 32.0 | 30.0 | 18.2 | 19.7 |
| 0.1–2.4 | 30.1 | 25.8 | 18.8 | 25.4 | 18.2 | 22.8 | 21.0 | 37.9 |
| 2.5–4.9 | 20.1 | 17.6 | 15.8 | 46.5 | 12.8 | 15.8 | 16.5 | 55.0 |
| 5.0–7.4 | 24.3 | 19.1 | 14.7 | 41.8 | 11.0 | 17.7 | 15.1 | 56.2 |
| ≥7.5 | 27.2 | 18.1 | 12.7 | 42.0 | 16.7 | 15.1 | 12.6 | 55.6 |
| BEC (cells/µL) in the year prior to the index date | | | | | | | | |
| <50 | 37.6 | 25.2 | 14.1 | 23.1 | 16.7 | 22.8 | 10.5 | 50.0 |
| 50–140 | 46.9 | 24.1 | 12.7 | 16.4 | 16.9 | 21.5 | 19.0 | 42.6 |
| 150–240 | 46.8 | 23.9 | 12.8 | 16.5 | 18.1 | 21.7 | 19.2 | 41.0 |
| 250–340 | 46.9 | 23.6 | 12.7 | 16.7 | 16.5 | 21.8 | 19.5 | 42.1 |
| 350–440 | 47.0 | 23.4 | 12.2 | 17.5 | 17.6 | 22.7 | 19.8 | 39.9 |
| 450–540 | 46.4 | 22.3 | 13.1 | 18.3 | 17.8 | 17.4 | 18.2 | 46.5 |
| ≥550 | 43.8 | 21.3 | 15.1 | 19.8 | 18.7 | 19.7 | 18.4 | 43.2 |
| Hospitalizations in the outcome year: | 0 | 1 | 2 | ≥3 | 0 | 1 | 2 | ≥3 |
| Exacerbations in the year prior to the index date | | | | | | | | |
| 0 | 97.1 | 2.5 | 0.3 | 0.1 |  |  |  |  |
| 1 | 94.9 | 4.0 | 0.7 | 0.4 | 82.9 | 11.4 | 3.6 | 2.1 |
| 2 | 92.4 | 5.5 | 1.3 | 0.7 | 89.3 | 7.7 | 1.9 | 1.2 |
| ≥3 | 86.6 | 8.9 | 2.5 | 1.9 | 83.7 | 10.6 | 3.1 | 2.6 |
| Hospitalizations in the year prior to the index date | | | | | | | | |
| 0 | 95.5 | 3.6 | 0.6 | 0.3 | 89.8 | 7.9 | 1.5 | 0.8 |
| 1 | 80.0 | 13.4 | 4.2 | 2.4 | 77.9 | 14.7 | 4.8 | 2.6 |
| 2 | 57.0 | 21.1 | 12.7 | 9.3 | 56.5 | 19.7 | 13.5 | 10.3 |
| ≥3 | 31.4 | 24.0 | 14.3 | 30.3 | 33.3 | 19.5 | 13.0 | 34.1 |

Abbreviations: BEC, blood eosinophil count; COPD, chronic obstructive pulmonary disease; OCS, oral corticosteroids.

**Supplementary Table 2.** Percentage of Patients in the Frequently Exacerbating Cohort Experiencing Hospitalizations and Exacerbations in the Outcome Year According to Hospitalizations, Exacerbations, and BECs in the Year Prior to the Index Date

|  | **Patients in the Frequently Exacerbating Cohort Who Were Hospitalized During the Year Prior to the Index Date**  **(N=1350), %** | | | | **Patients in the Frequently Exacerbating Cohort Who Were NOT Hospitalized During the Year Prior to the Index Date**  **(N=5130), %** | | | |
| --- | --- | --- | --- | --- | --- | --- | --- | --- |
| Hospitalizations in the outcome year: | 0 | 1 | 2 | ≥3 | 0 | 1 | 2 | ≥3 |
| Exacerbations in the year prior to the index date | | | | | | | | |
| 1 | 82.9 | 11.4 | 3.6 | 2.1 |  |  |  |  |
| 2 | 72.6 | 16.6 | 7.2 | 3.6 | 91.5 | 6.5 | 1.2 | 0.8 |
| ≥3 | 65.1 | 17.4 | 8.1 | 9.5 | 88.6 | 8.9 | 1.8 | 0.8 |
| Exacerbations in the outcome year: | 0 | 1 | 2 | ≥3 | 0 | 1 | 2 | ≥3 |
| Exacerbations in the year prior to the index date | | | | | | | | |
| 1 | 37.5 | 31.4 | 15.0 | 16.1 |  |  |  |  |
| 2 | 26 | 21.7 | 15.9 | 36.5 | 22.3 | 27.2 | 20.6 | 29.9 |
| ≥3 | 12.2 | 16.3 | 17.5 | 54.0 | 13.2 | 17.4 | 19.0 | 50.4 |
|  | **Patients in the Frequently Exacerbating Cohort with BECs of ≥250 Cells/µL Who Were Hospitalized During the Year Prior to the Index Date**  **(N=412), %** | | | | **Patients in the Frequently Exacerbating Cohort with BECs of ≥250 Cells/µL Who Were NOT Hospitalized During the Year Prior to the Index Date**  **(N=1699), %** | | | |
| Hospitalizations in the outcome year: | 0 | 1 | 2 | ≥3 | 0 | 1 | 2 | ≥3 |
| Exacerbations in the year prior to the index date | | | | | | | | |
| 1 | 82.1 | 14.1 | 3.8 | 0 |  |  |  |  |
| 2 | 72.7 | 20.8 | 5.2 | 1.3 | 91.5 | 6.4 | 1.2 | 0.9 |
| ≥3 | 68.1 | 16.7 | 6.2 | 8.9 | 89.1 | 8.7 | 1.5 | 0.7 |
| Exacerbations in the outcome year: | 0 | 1 | 2 | ≥3 | 0 | 1 | 2 | ≥3 |
| Exacerbations in the year prior to the index date | | | | | | | | |
| 1 | 38.5 | 37.2 | 11.5 | 12.8 |  |  |  |  |
| 2 | 27.3 | 27.3 | 16.9 | 28.6 | 23.3 | 26.8 | 16.3 | 33.6 |
| ≥3 | 14.4 | 15.2 | 21.0 | 49.4 | 11.8 | 17.3 | 21.5 | 49.4 |
|  | **Patients in the Frequently Exacerbating Cohort with BECs of ≥350 Cells/µL Who Were Hospitalized During the Year Prior to the Index Date**  **(N=227), %** | | | | **Patients in the Frequently Exacerbating Cohort with BECs of ≥350 Cells/µL Who Were NOT Hospitalized During the Year Prior to the Index Date**  **(N=922), %** | | | |
| Hospitalizations in the outcome year: | 0 | 1 | 2 | ≥3 | 0 | 1 | 2 | ≥3 |
| Exacerbations in the year prior to the index date | | | | | | | | |
| 1 | 76.6 | 19.1 | 0 | 4.3 |  |  |  |  |
| 2 | 75.8 | 18.2 | 3.0 | 3.0 | 92.1 | 5.8 | 1.4 | 0.8 |
| ≥3 | 72.1 | 16.3 | 4.1 | 7.5 | 89.8 | 7.7 | 1.8 | 0.7 |
| Exacerbations in the outcome year: |  |  |  |  | 0 | 1 | 2 | ≥3 |
| Exacerbations in the year prior to the index date | | | | | | | | |
| 1 | 31.9 | 34.0 | 14.9 | 19.1 |  |  |  |  |
| 2 | 30.3 | 24.2 | 21.2 | 24.2 | 21.9 | 26.6 | 15.9 | 35.6 |
| ≥3 | 19.0 | 17.7 | 17.7 | 45.6 | 13.3 | 16.0 | 21.5 | 49.2 |

Abbreviation: BEC, blood eosinophil count.
